# Supplementary material for: K2CO3-promoted formation of aryl esters from primary aryl amides by the acyl–acyl exchange process
Source: Royal Society of Chemistry journal article supplement (doi:10.1039/c6ob00187d), 2016-01-01

## **Electronic Supplementary Information (ESI)**

**For *Org. Biomol. Chem.***

### **K<sub>2</sub>CO<sub>3</sub>-Promoted formation of aryl esters from primary aryl amides by acyl-acyl exchange process**

Yong-Jun Bian,\* Xing-Yu Qu

*College of Chemistry and Chemical Engineering, Jinzhong University, Yuci 030619, P. R. China*

Email: [yjbian2013@jzxy.edu.cn](mailto:yjbian2013@jzxy.edu.cn)

### **Supporting information**

## Part I Experimental Section

$^1\text{H}$  NMR and  $^{13}\text{C}$  NMR spectra were recorded on Bruker ARX-300 or 500 MHz spectrometer with TMS as internal standard. Toluene and THF were distilled over sodium. 1,2-dichloroethane (DCE) and  $\text{CH}_3\text{CN}$  were distilled over calcium hydride. Other solvents were distilled under nitrogen. All bases were commercially available and used as received.

**1. Table 1.** Optimization of The Acyl-Acyl Exchange Reaction Conditions In the Presence of Copper Salts.<sup>a</sup>

| Entry | [Cu](10 mol %)             | Ligand              | Base                                              | Yield (%) <sup>b</sup> |
|-------|----------------------------|---------------------|---------------------------------------------------|------------------------|
| 1     | CuI                        | 1,10-phenanthroline | $\text{K}_3\text{PO}_4 \cdot 3\text{H}_2\text{O}$ | 16                     |
| 2     | CuBr                       | 1,10-phenanthroline | $\text{K}_3\text{PO}_4 \cdot 3\text{H}_2\text{O}$ | 23                     |
| 3     | CuCl                       | 1,10-phenanthroline | $\text{K}_3\text{PO}_4 \cdot 3\text{H}_2\text{O}$ | trace                  |
| 4     | $\text{Cu}(\text{OTf})_2$  | 1,10-phenanthroline | $\text{K}_3\text{PO}_4 \cdot 3\text{H}_2\text{O}$ | trace                  |
| 5     | $\text{Cu}(\text{acac})_2$ | 1,10-phenanthroline | $\text{K}_3\text{PO}_4 \cdot 3\text{H}_2\text{O}$ | 7                      |
| 6     | $\text{CuCl}_2$            | 1,10-phenanthroline | $\text{K}_3\text{PO}_4 \cdot 3\text{H}_2\text{O}$ | 10                     |
| 7     | $\text{Cu}(\text{OAc})_2$  | 1,10-phenanthroline | $\text{K}_3\text{PO}_4 \cdot 3\text{H}_2\text{O}$ | <5                     |
| 8     | $\text{CuSO}_4$            | 1,10-phenanthroline | $\text{K}_3\text{PO}_4 \cdot 3\text{H}_2\text{O}$ | 11                     |
| 9     | CuI                        | 2,2'-dipyridyl      | $\text{K}_3\text{PO}_4 \cdot 3\text{H}_2\text{O}$ | 15                     |
| 10    | CuI                        | 1,10-phenanthroline | $\text{K}_2\text{CO}_3$                           | 58                     |
| 11    | -                          | -                   | -                                                 | 0                      |
| 12    | CuI                        | 1,10-phenanthroline | -                                                 | 0                      |
| 13    | -                          | -                   | $\text{K}_2\text{CO}_3$                           | 60                     |

<sup>a</sup> Conditions: **1a** (0.25 mmol), **2a** (0.5 mmol), [Cu] (0.025 mmol), ligand (0.05 mmol), base (2 equiv), 120°C for 12 h in toluene, unless otherwise noted. <sup>b</sup> Isolated yield..

**2. Table 2.** Screening of Various Bases for This Acyl-Acyl Exchange Reaction without the Transition Metal<sup>a</sup>

| Entry | Base                                              | Yield (%) <sup>b</sup> |
|-------|---------------------------------------------------|------------------------|
| 1     | $\text{K}_3\text{PO}_4 \cdot 3\text{H}_2\text{O}$ | 18                     |
| 2     | <i>t</i> -BuOK                                    | 33                     |
| 3     | LiOAc                                             | trace                  |

|    |                                 |                 |
|----|---------------------------------|-----------------|
| 4  | NaOAc                           | 0               |
| 5  | Cs <sub>2</sub> CO <sub>3</sub> | 43 <sup>c</sup> |
| 6  | KF                              | 0               |
| 7  | CsF                             | trace           |
| 8  | NaOTf                           | 0               |
| 9  | DBU                             | 0               |
| 10 | NaCO <sub>3</sub>               | 0               |
| 11 | KOH                             | 33              |
| 12 | <i>t</i> -BuOLi                 | 52              |
| 13 | CsOH                            | 50              |
| 14 | Ag <sub>2</sub> CO <sub>3</sub> | 0               |
| 15 | K <sub>2</sub> CO <sub>3</sub>  | 60              |
| 16 | K <sub>2</sub> CO <sub>3</sub>  | 72 <sup>d</sup> |
| 17 | K <sub>2</sub> CO <sub>3</sub>  | 79 <sup>e</sup> |
| 18 | K <sub>2</sub> CO <sub>3</sub>  | 82 <sup>f</sup> |

<sup>a</sup> Conditions: **1a** (0.25 mmol), **2a** (0.5 mmol), base (2 equiv), 120°C for 12 h in toluene, unless otherwise noted. <sup>b</sup> Isolated yield. <sup>c</sup> 1 equiv of Cs<sub>2</sub>CO<sub>3</sub> was used. <sup>d</sup> 1 equiv of K<sub>2</sub>CO<sub>3</sub> was used. <sup>e</sup> 0.5 equiv of K<sub>2</sub>CO<sub>3</sub> was used. <sup>f</sup> 20 mol% of K<sub>2</sub>CO<sub>3</sub> was used

**3. Table 3.** Screening of Various Solvents for This Acyl-Acyl Exchange Reaction without the Transition Metal<sup>a</sup>

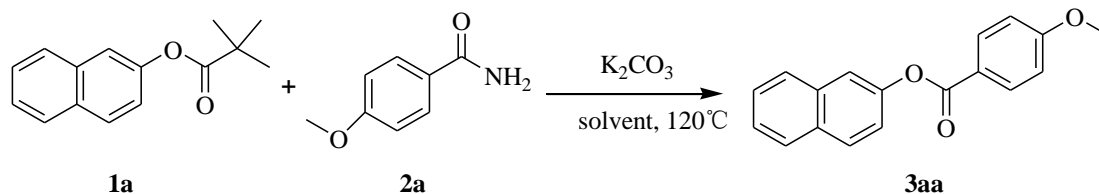

| Entry | Solvent            | Yield (%) <sup>b</sup> |
|-------|--------------------|------------------------|
| 1     | toluene            | 82                     |
| 2     | 1,4-dioxane        | trace                  |
| 3     | DCE                | 0                      |
| 4     | CH <sub>3</sub> CN | 0                      |
| 5     | THF                | 0                      |
| 6     | DMF                | <5                     |
| 7     | anisole            | 0                      |
| 8     | DMAc               | 0                      |
| 9     | DMSO               | 0                      |

<sup>a</sup> Conditions: **1a** (0.25 mmol), **2a** (0.5 mmol), K<sub>2</sub>CO<sub>3</sub> (20 mol%), 120°C for 12 h in solvent, unless otherwise noted. <sup>b</sup> Isolated yield.

**4.** Isolation of the primary amide products for the evidence of the proposed acyl-acyl exchange reaction.

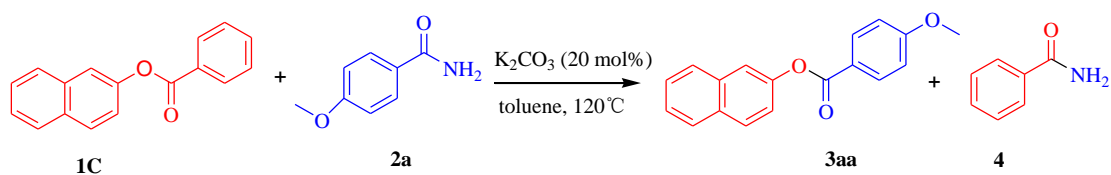

A mixture of 2-naphthyl benzoate **1c** (0.25 mmol), 4-methoxybenzamide **2a** (0.5 mmol) and  $\text{K}_2\text{CO}_3$  (20 mol%) in toluene was stirred at 120 °C for 12 h. After the reaction was achieved, the primary benzamide product **4** was isolated by preparative TLC (silica gel, EtOAc as eluent) in 33% yield (10 mg) as a white solid:  $R_f = 0.56$  (in EtOAc);  $^1\text{H NMR}$  ( $\text{CDCl}_3$ , 600 MHz):  $\delta$  (ppm): 7.84 (d,  $J = 7.2$  Hz, 2H), 7.56 (t,  $J = 7.2$  Hz, 1H), 7.48 (t,  $J = 7.2$  Hz, 2H), 6.17 (s, 2H).

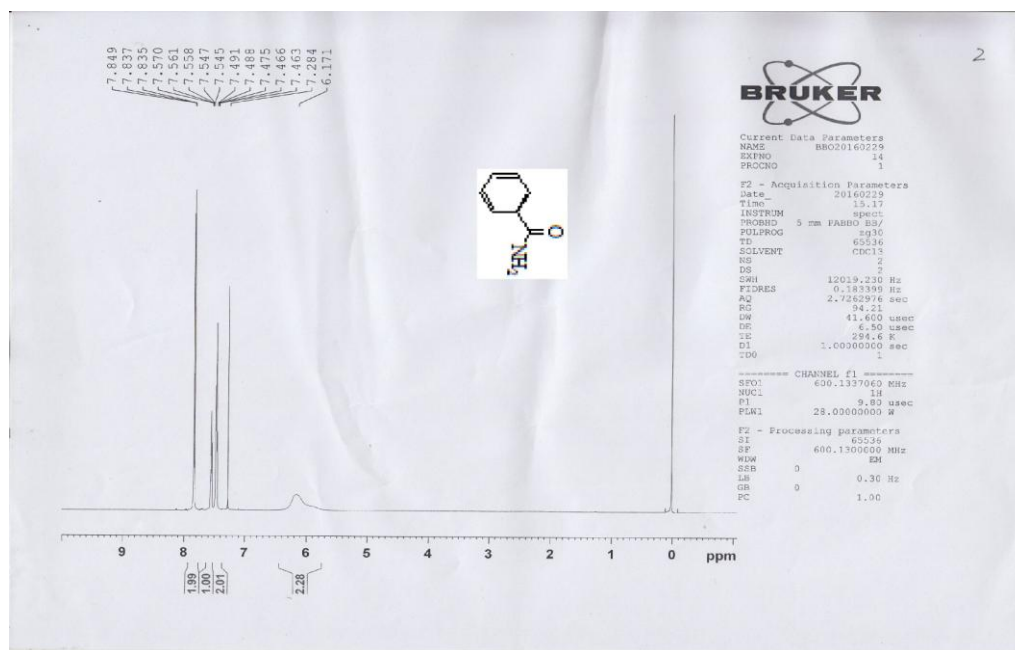

### 5. The reaction of unprotected 2-naphthol with 4-methoxybenzamide

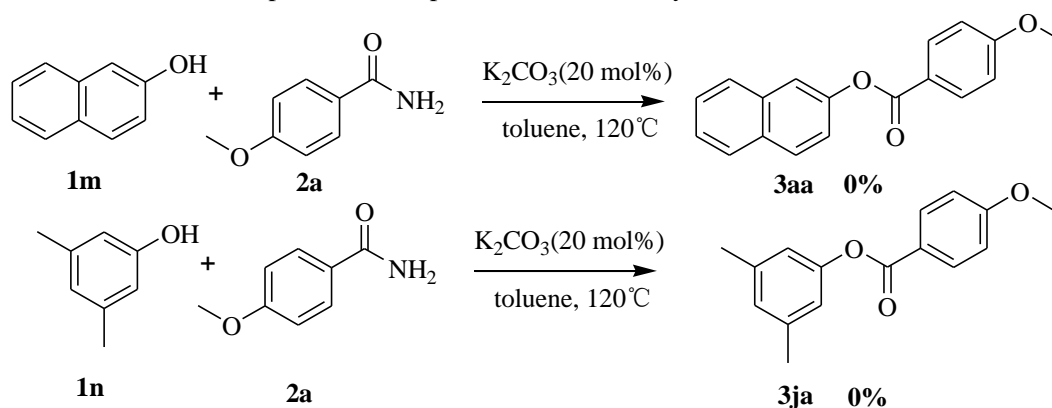

**Scheme 1.** The unprotected 2-naphthol and 3, 5-dimethylphenol was tried for this reaction. A mixture of **1m** or **1n** (0.25 mmol), 4-methoxybenzamide **2a** (0.50 mmol) and  $\text{K}_2\text{CO}_3$  (20 mol%) in toluene was stirred at 120 °C for 12 h;

6. The reaction of secondary and tertiary amides with 2-naphthyl pivalate

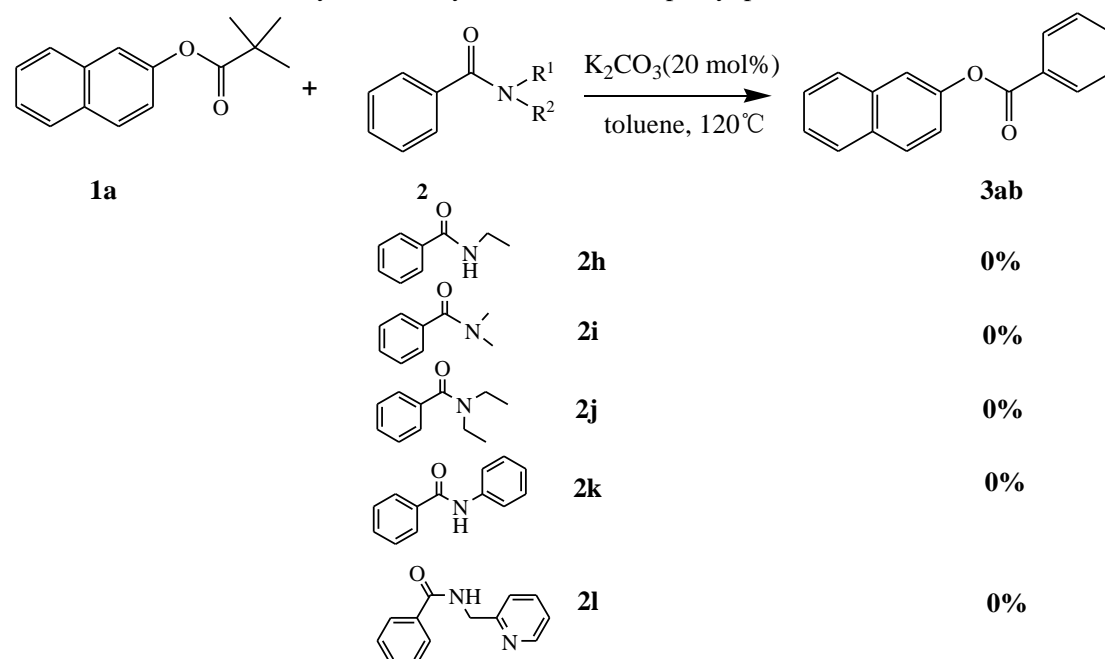

**Scheme 2.** Several secondary and tertiary amides were tried for this reaction under the standard condition.

**General Procedure for This Acyl-Acyl Exchange Reaction of esters with primary**

**amides:** A mixture of esters **1** (0.25 mmol), primary amides **2** (0.5 mmol) and  $K_2CO_3$  (20 mol%) in toluene was stirred in a sealed tube under air without a reflux condenser attached at  $120^\circ C$  for 12 h. After the reaction was achieved, the crude mixture was purified by column chromatography (silica gel, EtOAc / petroleum ether ) to afford the desired products **3**. All products have been reported previously and identical with that described in literature.

naphthalen-6-yl 4-methoxybenzoate **3aa** <sup>[1]</sup>

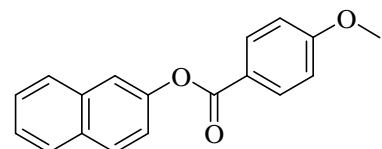

The general procedure was followed with 2-naphthyl pivalate (0.25 mmol), 4-methoxybenzamide (0.5 mmol) and  $K_2CO_3$  (20 mol%); Yield: 57 mg, 82%;  $^1H$  NMR ( $CDCl_3$ , 300 MHz):  $\delta$  (ppm): 8.22 (d,  $J = 8.7$  Hz, 2H), 7.92-7.83 (m, 3 H), 7.69 (d,  $J = 1.5$  Hz, 1 H), 7.54-7.47 (m, 2 H), 7.38-7.35 (m, 1 H) 7.02 (d,  $J = 8.7$  Hz, 2 H), 3.92 (s, 3H); MS (EI)  $m/z$  (%) 278.1 (M+, 17.5), 135.0(100), 107.0 (26.8), 77.0 (31.0).

phenyl 4-methoxybenzoate **3ba** <sup>[2]</sup>

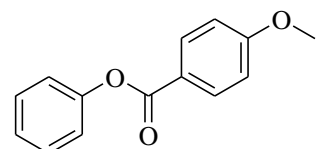

Yield: 41.6 mg, 73%;  $^1H$  NMR ( $CDCl_3$ , 300 MHz):  $\delta$  (ppm): 8.19-8.15 (m, 2 H), 7.46-7.41 (m, 2 H), 7.30-7.20 (m, 3 H), 7.02-6.98 (m, 2 H), 3.91 (s, 3H);  $^{13}C$  NMR ( $CDCl_3$ , 75 MHz):  $\delta$  (ppm): 164.8, 163.9, 150.9, 132.2, 129.5, 125.6, 121.8, 121.7, 113.8, 55.4.

p-tolyl 4-methoxybenzoate **3ca** <sup>[3]</sup>

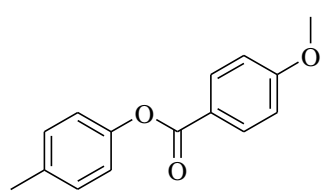

Yield: 44.7 mg, 74%; <sup>1</sup>H NMR (CDCl<sub>3</sub>, 300 MHz): δ (ppm): 8.19-8.14 (m, 2 H), 7.21 (d, *J* = 8.4 Hz, 2 H), 7.10 (d, *J* = 8.4 Hz, 2 H), 7.03-7.01 (m, 2 H), 3.91 (s, 3H), 2.40 (s, 3H); <sup>13</sup>C NMR (CDCl<sub>3</sub>, 75 MHz): δ (ppm): 165.0, 163.8, 148.8, 135.0, 132.2, 130.0, 122.2, 121.5, 113.9, 55.4, 20.9.

4-methoxyphenyl 4-methoxybenzoate **3da** <sup>[4]</sup>

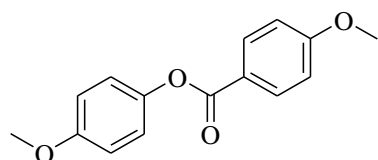

Yield: 48.3 mg, 75%; <sup>1</sup>H NMR (CDCl<sub>3</sub>, 300 MHz): δ (ppm): 8.17-8.14 (m, 2 H), 7.14-7.10 (m, 2 H), 7.00-6.91 (m, 4 H), 3.90 (s, 3H), 3.83 (s, 3H); <sup>13</sup>C NMR (CDCl<sub>3</sub>, 125 MHz): δ (ppm): 165.3, 163.8, 157.2, 144.5, 132.2, 122.5, 122.0, 114.5,

113.8, 55.6, 55.5.

m-tolyl 4-methoxybenzoate **3ea** <sup>[3]</sup>

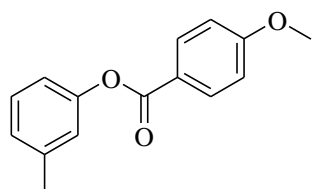

Yield: 36.7 mg, 61%; <sup>1</sup>H NMR (CDCl<sub>3</sub>, 300 MHz): δ (ppm): 8.19-8.14 (m, 2 H), 7.34-7.27 (m, 1 H), 7.10-6.97 (m, 5 H), 3.90 (s, 3H), 2.40 (s, 3H); <sup>13</sup>C NMR (CDCl<sub>3</sub>, 125 MHz): δ (ppm): 165.1, 163.9, 151.0, 139.6, 132.3, 129.2, 126.6, 122.4, 122.0, 118.8, 113.8,

55.5, 21.4.

4-acetylphenyl 4-methoxybenzoate **3fa** <sup>[5]</sup>

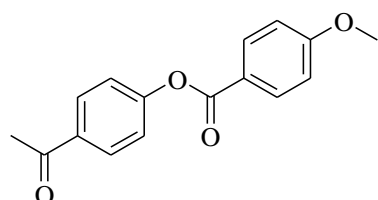

Yield: 26 mg, 39%; <sup>1</sup>H NMR (CDCl<sub>3</sub>, 300 MHz): δ (ppm): 8.16 (d, *J* = 8.4 Hz, 2 H), 8.03 (d, *J* = 8.1 Hz, 2 H), 7.32 (d, *J* = 8.4 Hz, 2 H), 7.00 (d, *J* = 8.1 Hz, 2 H), 3.91 (s, 3H), 2.63 (s, 3H); MS (EI) *m/z* (%) 270.0 (M<sup>+</sup>, 0.15), 135.9(6), 134.9 (100),

120.9(8), 106.9(6).

4-chlorophenyl 4-methoxybenzoate **3ga** <sup>[2]</sup>

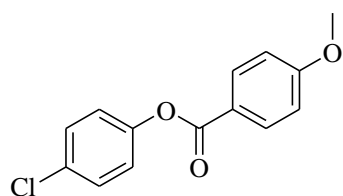

Yield: 49.4 mg, 76%; <sup>1</sup>H NMR (CDCl<sub>3</sub>, 300 MHz): δ (ppm): 8.17-8.12 (m, 2 H), 7.40 (d, *J* = 8.8 Hz, 2 H), 7.15 (d, *J* = 8.8 Hz, 2 H), 7.03-6.96 (m, 2 H), 3.90 (s, 3H); <sup>13</sup>C NMR (CDCl<sub>3</sub>, 75 MHz): δ (ppm): 163.9, 149.5, 132.2, 131.0, 129.4, 123.0, 121.3, 113.8, 55.4.

4-bromophenyl 4-methoxybenzoate **3ha** <sup>[6]</sup>

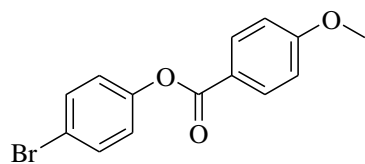

Yield: 55.8 mg, 73%; <sup>1</sup>H NMR (CDCl<sub>3</sub>, 300 MHz): δ (ppm): 8.17-8.12 (m, 2 H), 7.56-7.51 (m, 2 H), 7.13-7.08 (m, 2 H), 7.02-6.97 (m, 2 H), 3.90 (s, 3H); <sup>13</sup>C NMR (CDCl<sub>3</sub>, 125 MHz):

δ (ppm): 164.6, 164.1, 150.1, 132.5, 132.3, 123.6, 121.4, 118.8, 113.9, 55.5.

4-fluorophenyl 4-methoxybenzoate **3ia** <sup>[7]</sup>

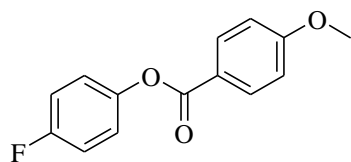

Yield: 44 mg, 72%; <sup>1</sup>H NMR (CDCl<sub>3</sub>, 300 MHz): δ (ppm): 8.17-8.13 (m, 2 H), 7.20-7.08 (m, 4 H), 7.01-6.97 (m, 2 H), 3.90 (s, 3H); <sup>13</sup>C NMR (CDCl<sub>3</sub>, 75 MHz): δ (ppm): 164.9, 164.0, 160.1 (d, *J* = 243.0 Hz), 146.8, 132.2, 123.1, 121.4, 115.9 (d, *J* = 23.3 Hz), 113.8, 55.4.

3, 5-dimethylphenyl 4-methoxybenzoate **3ja** <sup>[8]</sup>

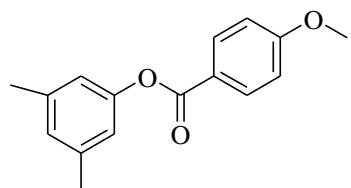

Yield: 34.4 mg, 54%; <sup>1</sup>H NMR (CDCl<sub>3</sub>, 300 MHz): δ (ppm): 8.18-8.13 (m, 2 H), 7.01-6.96 (m, 2 H), 6.90 (s, 1H), 6.83 (s, 2H), 3.90 (s, 3H), 2.35 (s, 6H); <sup>13</sup>C NMR (CDCl<sub>3</sub>, 75 MHz): δ (ppm): 165.2, 163.8, 151.0, 139.3, 132.3, 127.5, 122.1, 119.4, 113.8, 55.5, 21.3.

butyl 4-methoxybenzoate **3la** <sup>[9]</sup>

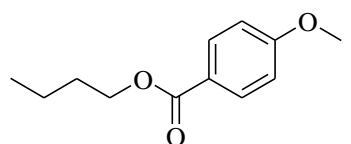

Yield: 38.2 mg, 74%; <sup>1</sup>H NMR (CDCl<sub>3</sub>, 300 MHz): δ (ppm): 8.01-7.98 (m, 2 H), 6.92 (d, *J* = 8.7Hz, 2 H), 4.29 (t, *J* = 6.6Hz, 2H), 3.86 (s, 3H), 1.78-1.69 (m, 2 H), 1.54-1.41 (m, 2 H), 0.98 (t, *J* = 7.5Hz, 3H); <sup>13</sup>C NMR (CDCl<sub>3</sub>, 75 MHz): δ (ppm): 166.4, 163.3, 131.5, 123.0, 113.5, 64.5, 55.3, 31.0, 19.3, 13.8.

naphthalen-6-yl benzoate **3ab** <sup>[10]</sup>

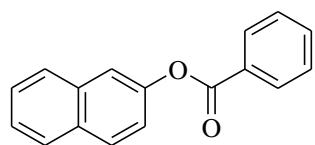

Yield: 50 mg, 81%; <sup>1</sup>H NMR (CDCl<sub>3</sub>, 500 MHz): δ (ppm): 8.69 (s, 1H), 8.08 (d, *J* = 8.6 Hz, 1H), 7.89 (d, *J* = 8.1 Hz, 1H), 7.86-7.79 (m, 2H), 7.55-7.46 (m, 2H), 7.39-7.36 (m, 2H), 7.21-7.11 (m, 3H); <sup>13</sup>C NMR (CDCl<sub>3</sub>, 125 MHz): δ (ppm): 165.3, 151.0, 135.8, 132.5, 131.9, 129.6, 129.5, 128.7, 128.4, 127.8, 126.8, 126.0, 125.4, 121.7.

naphthalen-6-yl 4-methylbenzoate **3ac** <sup>[2]</sup>

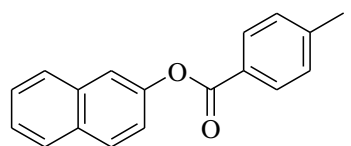

Yield: 54 mg, 82%; <sup>1</sup>H NMR (CDCl<sub>3</sub>, 300 MHz): δ (ppm): 8.16 (dd, *J* = 8.1, 1.8 Hz, 2H), 7.93-7.83 (m, 3 H), 7.70 (d, *J* = 2.4 Hz, 1 H), 7.55-7.47 (m, 2 H), 7.38-7.33 (m, 3 H), 2.48 (s, 3H); MS (EI) *m/z* (%) 278.1 (M<sup>+</sup>, 19.9), 119.0 (100), 91.0 (42.8).

naphthalen-3-yl 4-chlorobenzoate **3ad** <sup>[2]</sup>

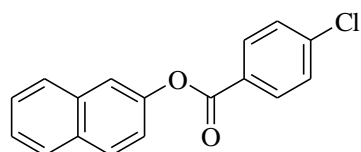

The general procedure was followed with 2-naphthyl pivalate (0.25 mmol), 4-chlorobenzamide (0.5 mmol) and K<sub>2</sub>CO<sub>3</sub> (20 mol%); Yield: 56 mg, 80%; <sup>1</sup>H NMR (CDCl<sub>3</sub>, 300 MHz): δ (ppm): 8.20 (d, *J* = 8.7Hz, 2 H), 7.94-7.84 (m, 3 H), 7.71 (d, *J* = 1.8Hz, 1 H), 7.56-7.48 (m, 4 H), 7.37 (dd, *J* = 8.4, 2.4Hz, 1H); <sup>13</sup>C NMR (CDCl<sub>3</sub>, 125 MHz): δ (ppm): 164.6, 148.4, 140.2, 133.8, 131.63, 131.60, 129.6, 129.0, 128.1, 128.0, 127.7, 126.7, 125.9, 121.1, 118.7.

phenyl 4-bromobenzoate **3be** <sup>[11]</sup>

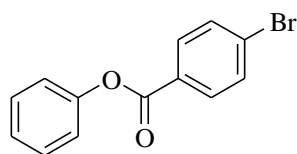

Yield: 49.4 mg, 72%; <sup>1</sup>H NMR (CDCl<sub>3</sub>, 300 MHz): δ (ppm): 8.08 (d, *J* = 8.6 Hz, 2H), 7.67 (d, *J* = 8.6 Hz, 2H), 7.48 -7.42 (m, 2H), 7.32-7.28 (m, 1H), 7.23 -7.20 (m, 2H); <sup>13</sup>C NMR (CDCl<sub>3</sub>, 125 MHz): δ (ppm): 164.5, 150.7, 131.9, 131.6, 129.5, 128.8, 128.5, 126.0, 121.6.

## Reference

- [1] Rosa, J. N.; Reddy, S.; Candeias, N. R.; Cal, P. M. S. D.; Gois, P. M. P. *Org. Lett.*, 2010, **12**, 2686.
- [2] Arde, P.; Ramanjaneyulu, B. T.; Reddy, V.; Saxena, A.; Anand, R. V. *Org. Biomol. Chem.*, 2012, **10**, 848-851.
- [3] He, H. Q.; Chang, Y. W.; Xu, W. M. *Lett. Org. Chem.*, 2015, **12**, 280.
- [4] Fitzjarrald, V. P.; Pongdee, R. *Tetrahedron Lett.*, 2007, **48**, 3553
- [5] Bao, Y.-S.; Chen, C.-Y.; Huang, Z.-Z. *J. Org. Chem.*, 2012, **77**, 8344.
- [6] Helmi, N.; Kari, N.; Paavo, P. *J. Org. Chem.*, 2004, **69**, 3794.
- [7] K. C. Joshi.; S. C. Bahel.; *J. Indian Chem. Soc.*, 1960, **37**, 687
- [8] Shintou, T.; Fukumoto, K.; Mukaiyama, T. *B Chem Soc Jpn.*, 2004, **77**, 1569.
- [9] Ma, G.-Z.; Leng, Y.-T.; Qiao, H.-J.; Yang, F.; Wang, S.-W.; Wu, Y.-J. *Appl. Organomet. Chem.*, 2014, **28**, 44.
- [10] Chen, J. X.; Peng, Y.; Liu, M. C.; Ding, J. C.; Su, W. K.; Wu, H. Y. *Adv. Synth. Catal.*, 2012, **354**, 2117.
- [11] Luo, F.; Pan, C. D.; Qian, P. C.; Cheng, J. *Synthesis.*, 2010, **12**, 2005.



## Part II $^1\text{H}$ NMR and $^{13}\text{C}$ NMR

$^1\text{H}$  NMR of naphthalen-6-yl 4-methoxybenzoate **3aa**

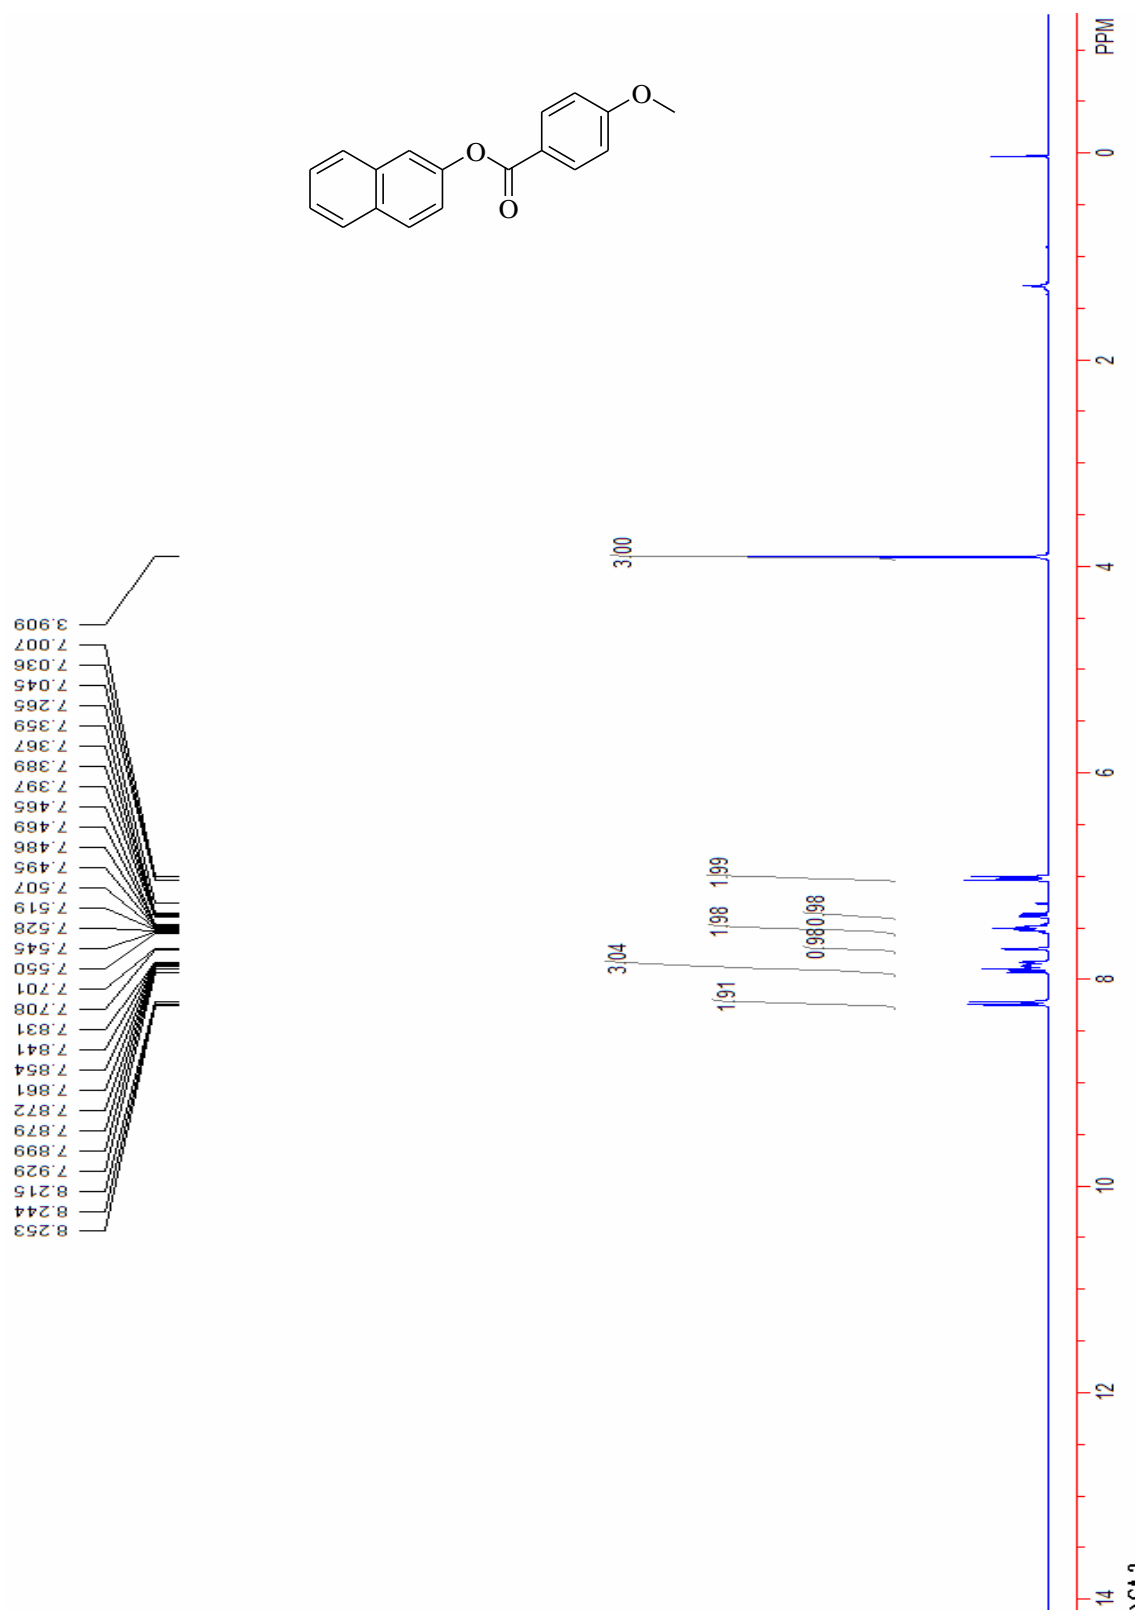

$^1\text{H}$  NMR of phenyl 4-methoxybenzoate **3ba**

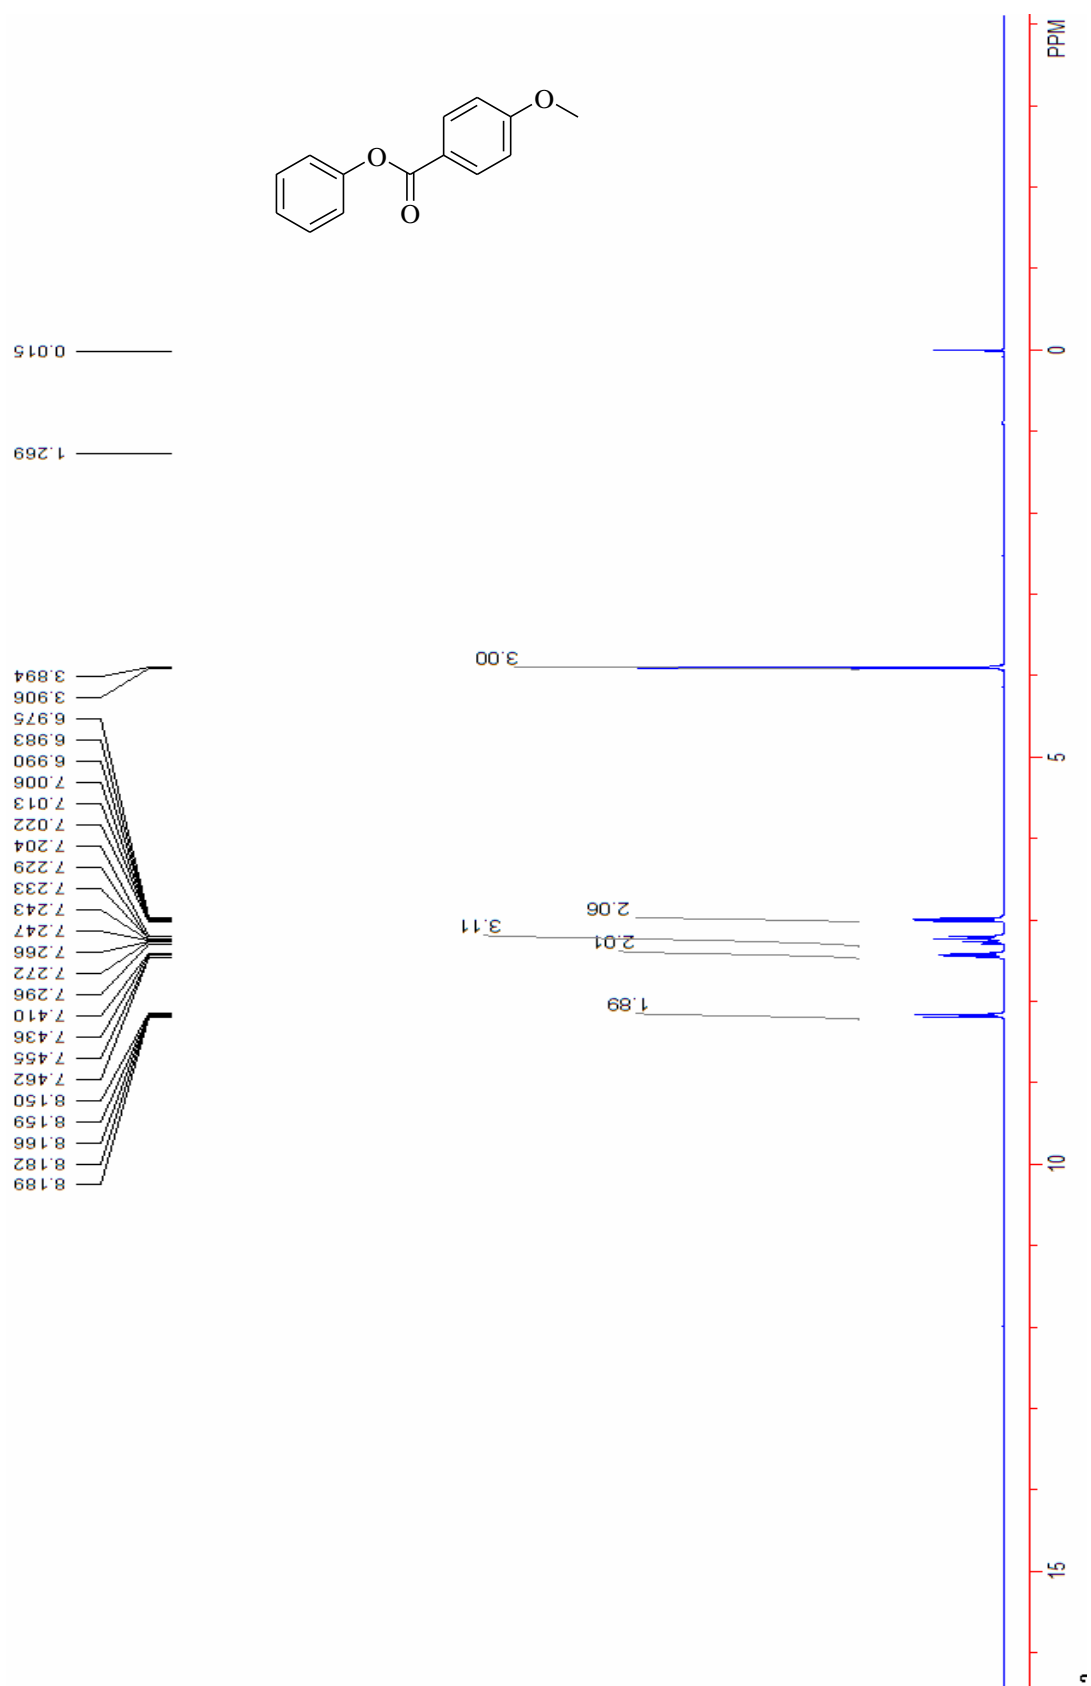

$^1\text{H}$  NMR of 4-methoxyphenyl 4-methoxybenzoate **3da**

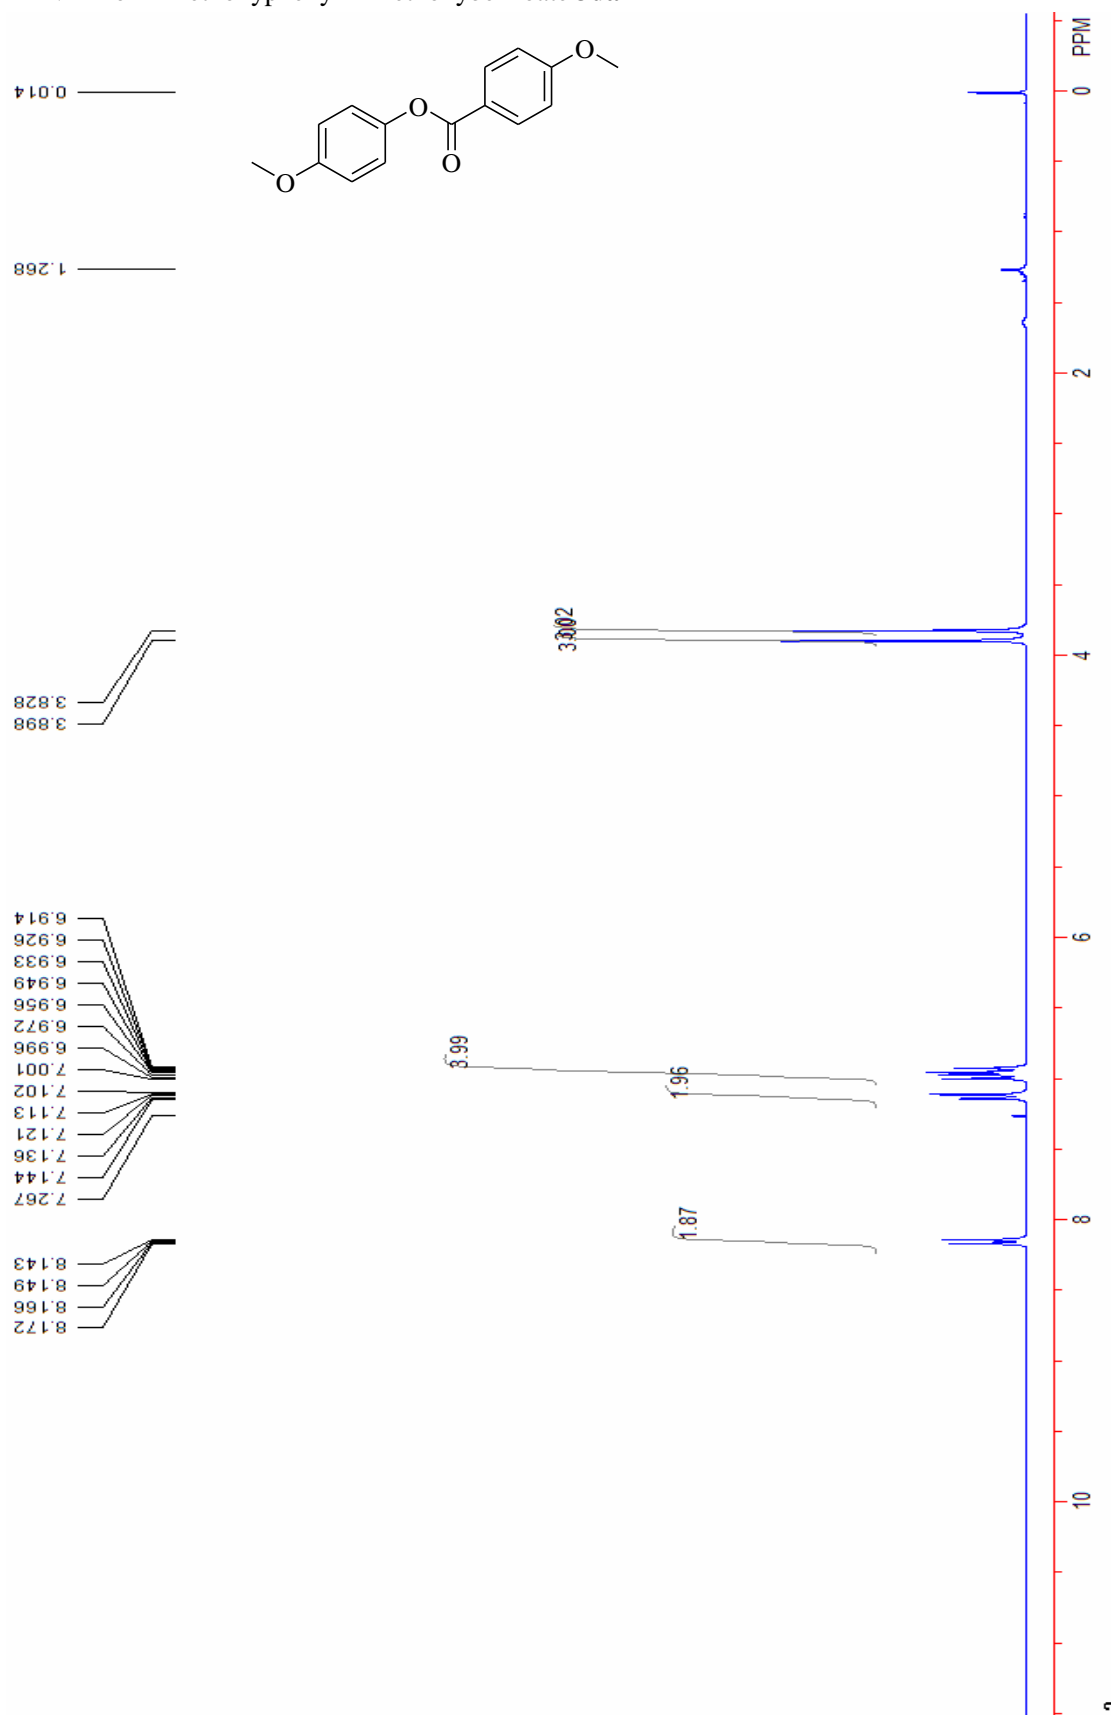

$^1\text{H}$  NMR of m-tolyl 4-methoxybenzoate **3ea**

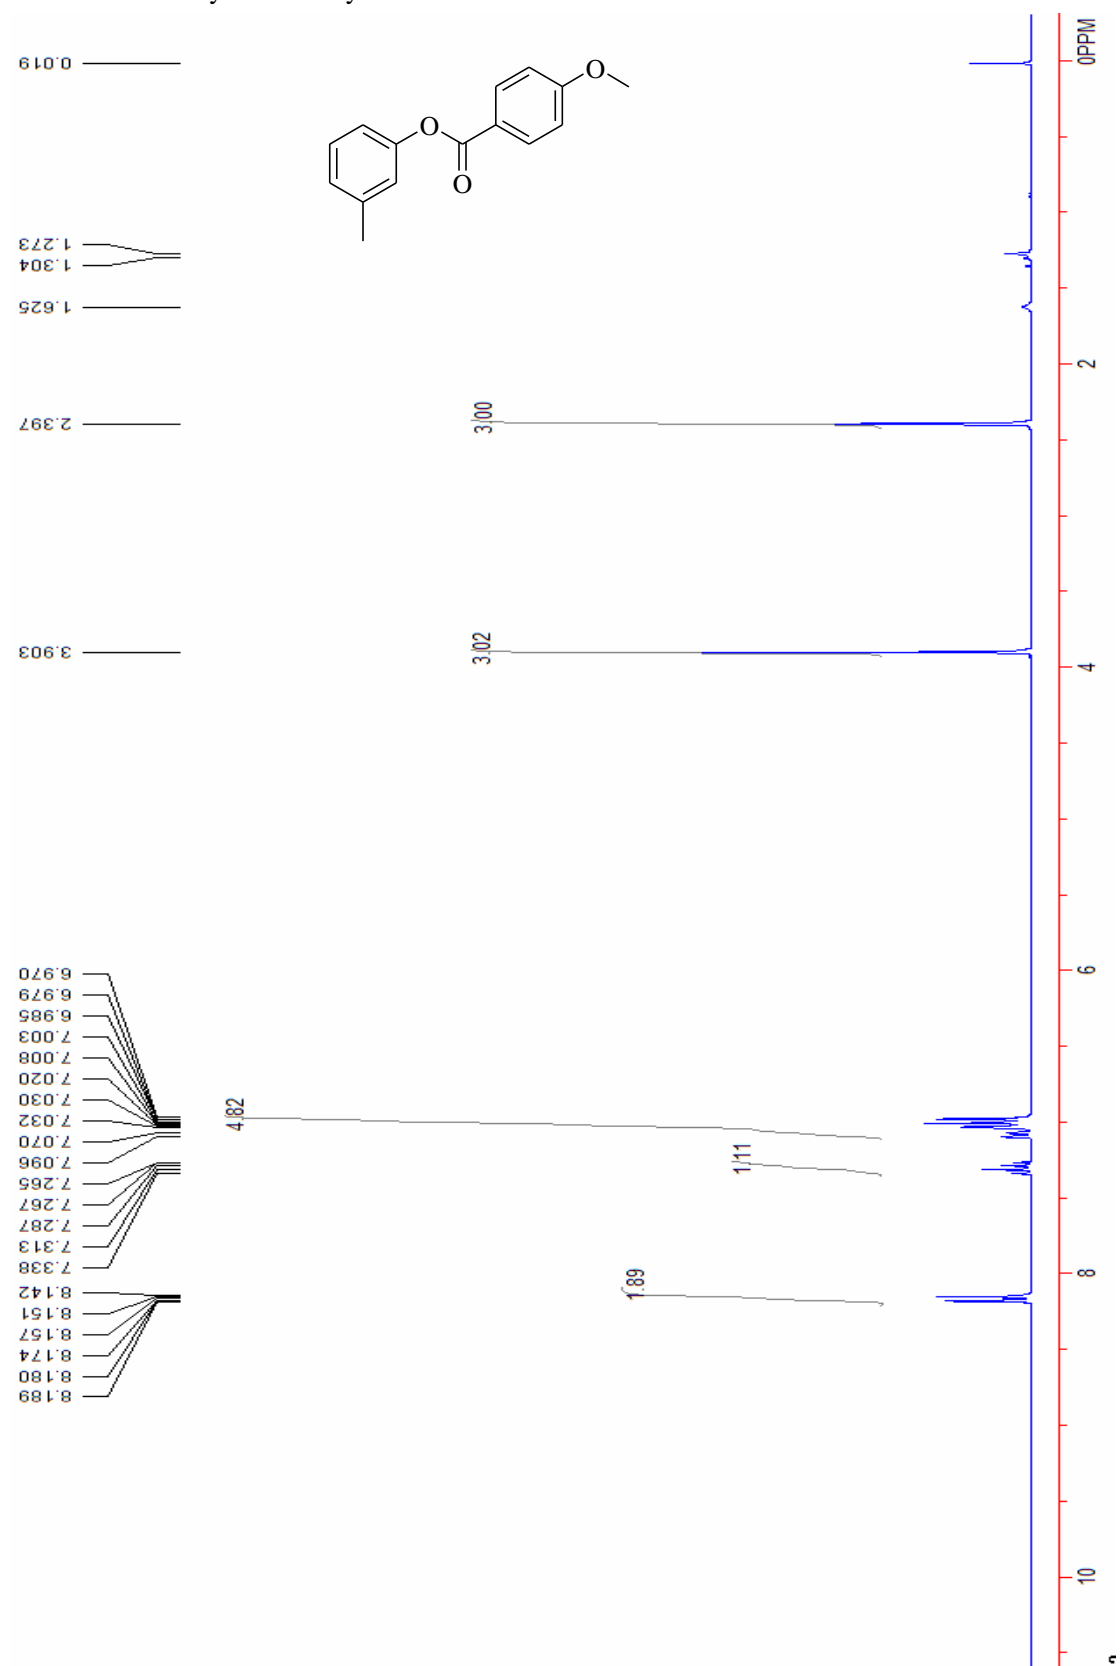

$^1\text{H}$  NMR of 4-acetylphenyl 4-methoxybenzoate **3fa**

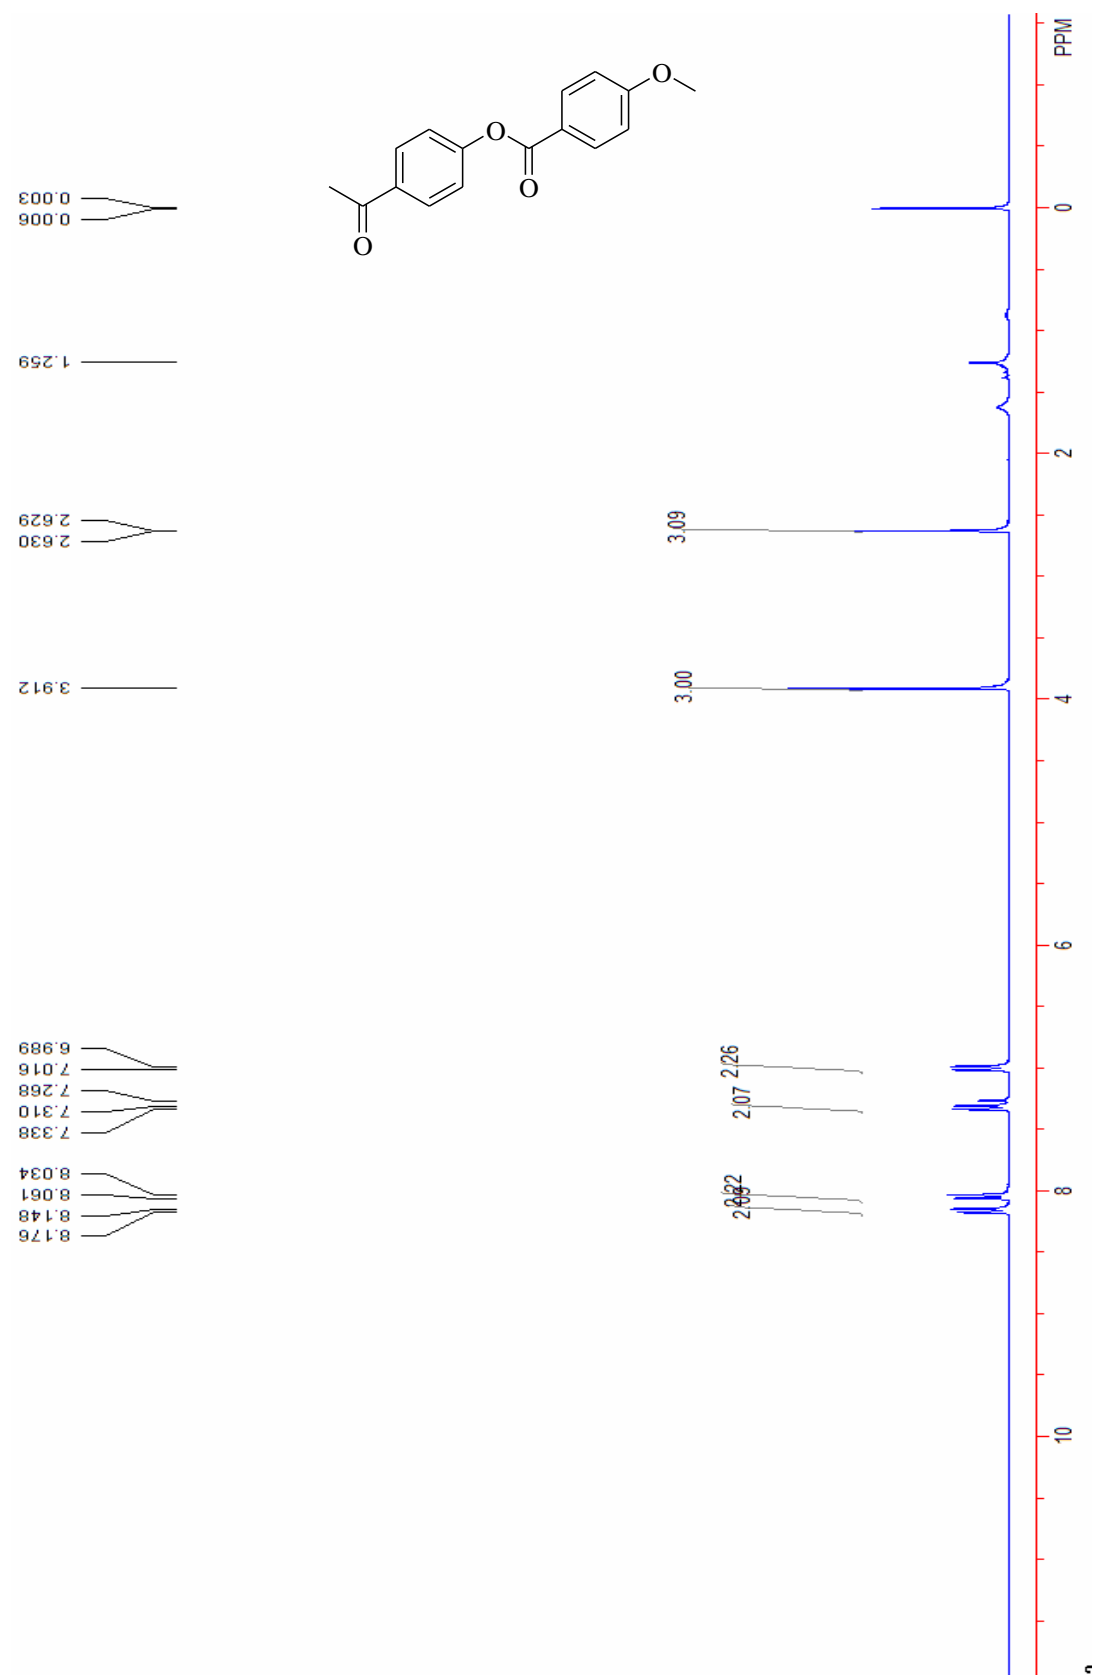

$^1\text{H}$  NMR of 4-bromophenyl 4-methoxybenzoate **3ha**

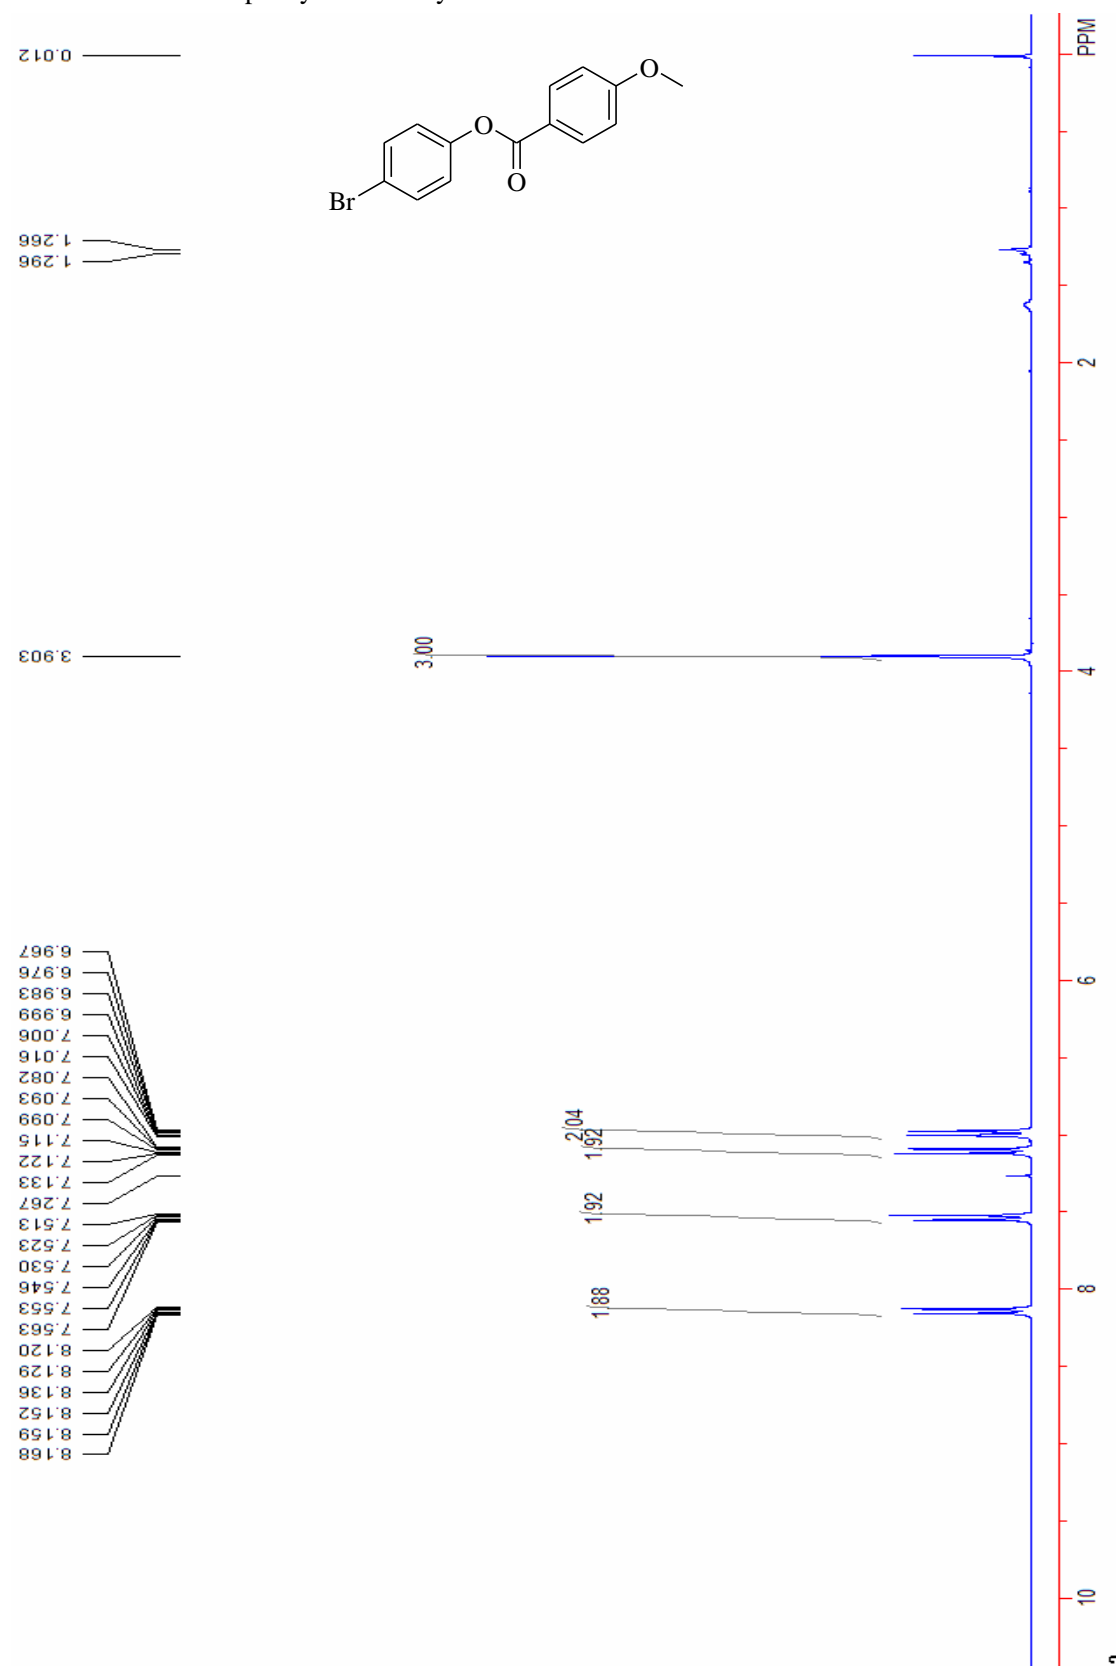

$^1\text{H}$  NMR of 4-fluorophenyl 4-methoxybenzoate **3ia**

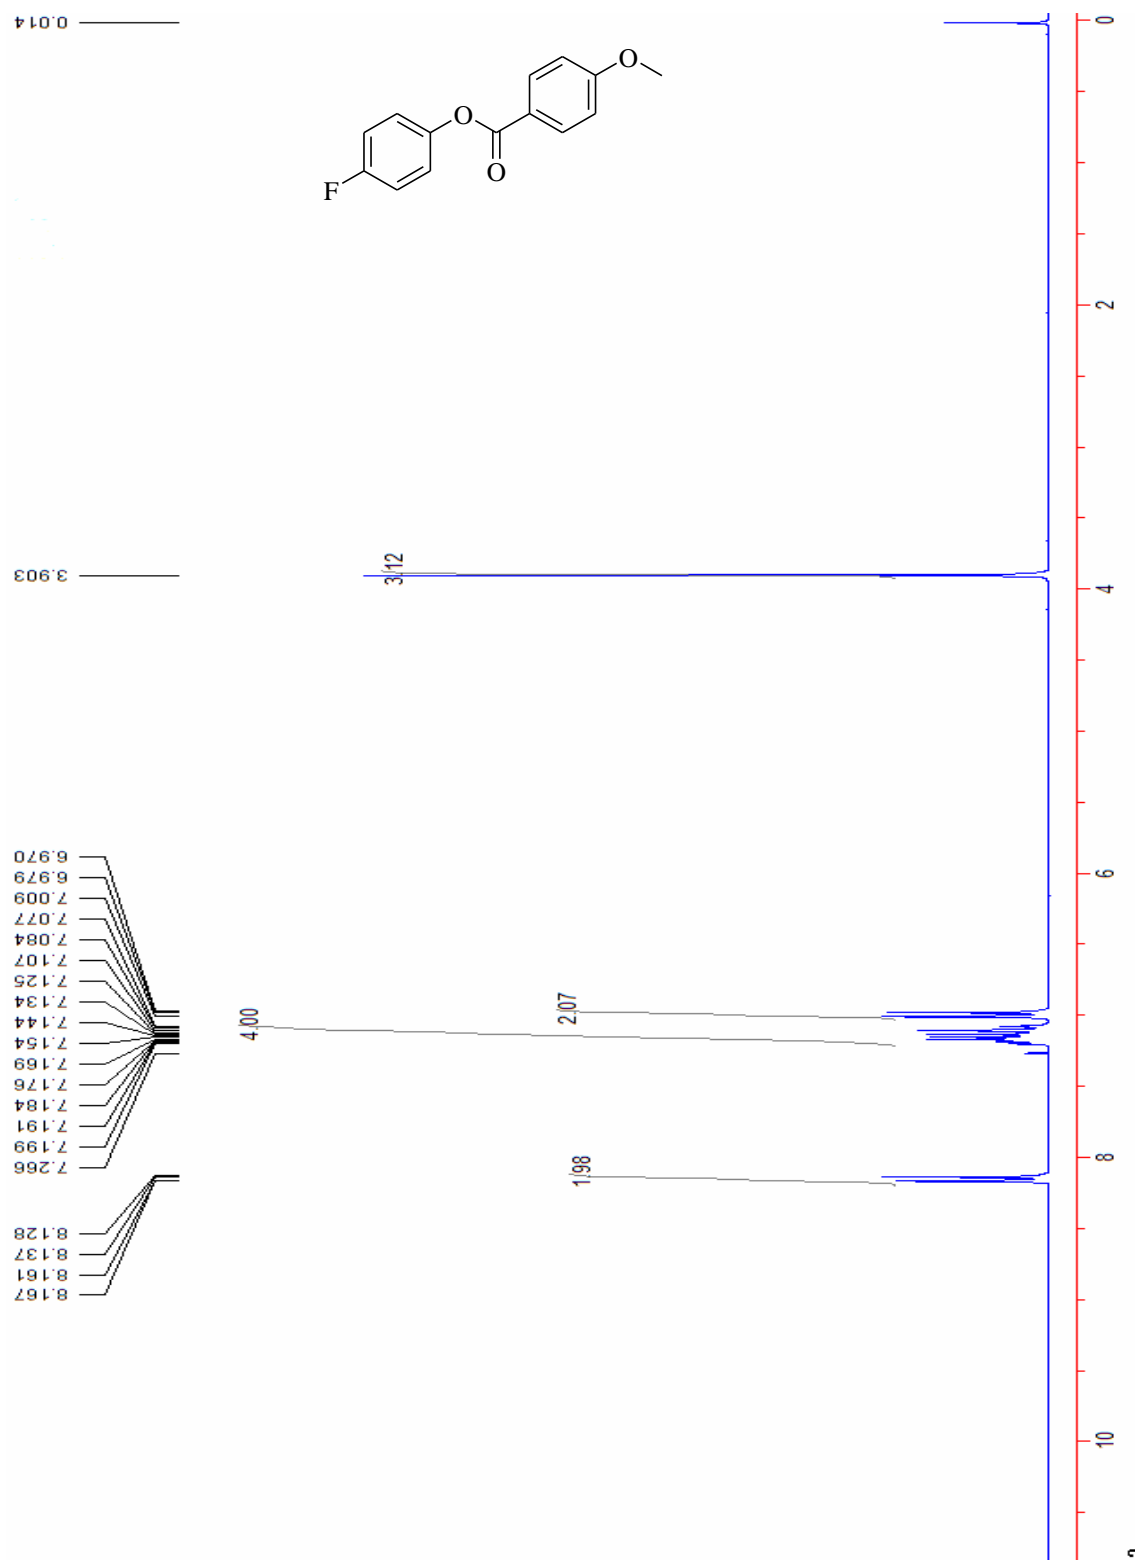

$^1\text{H}$  NMR of 3,5-dimethylphenyl 4-methoxybenzoate **3ja**

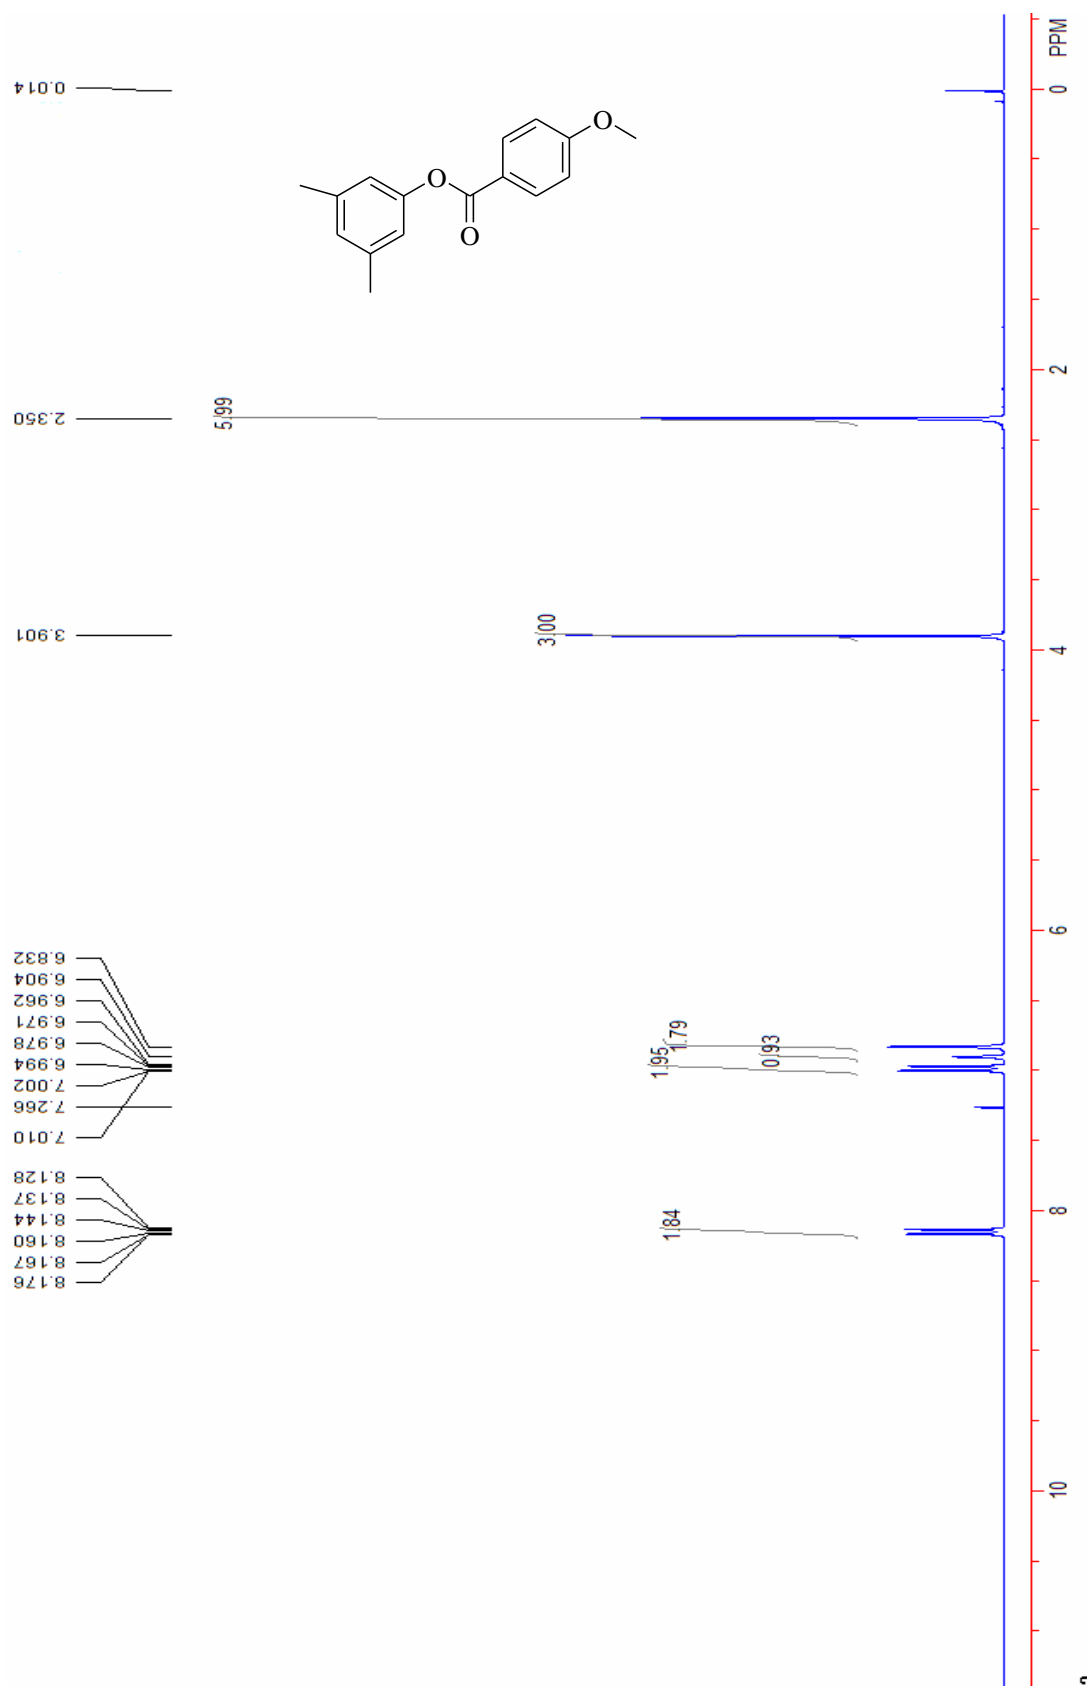



$^{13}\text{C}$  NMR of 3,5-dimethylphenyl 4-methoxybenzoate **3ja**

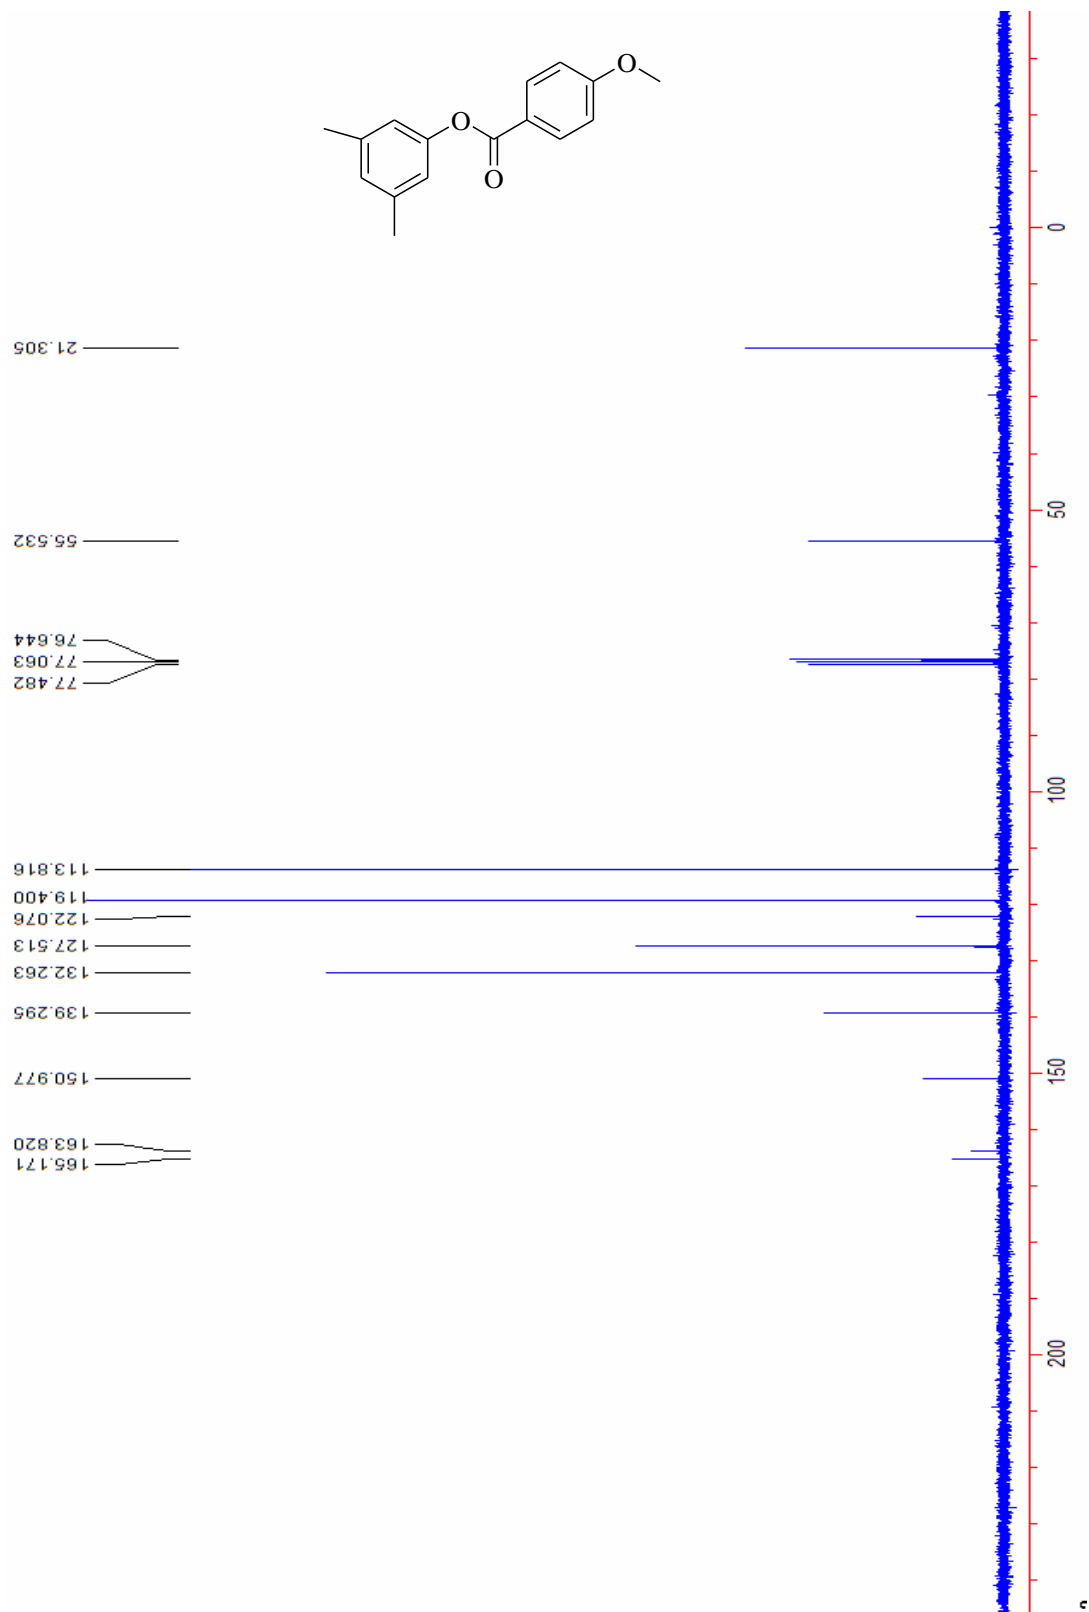

$^1\text{H}$  NMR of butyl 4-methoxybenzoate **3la**

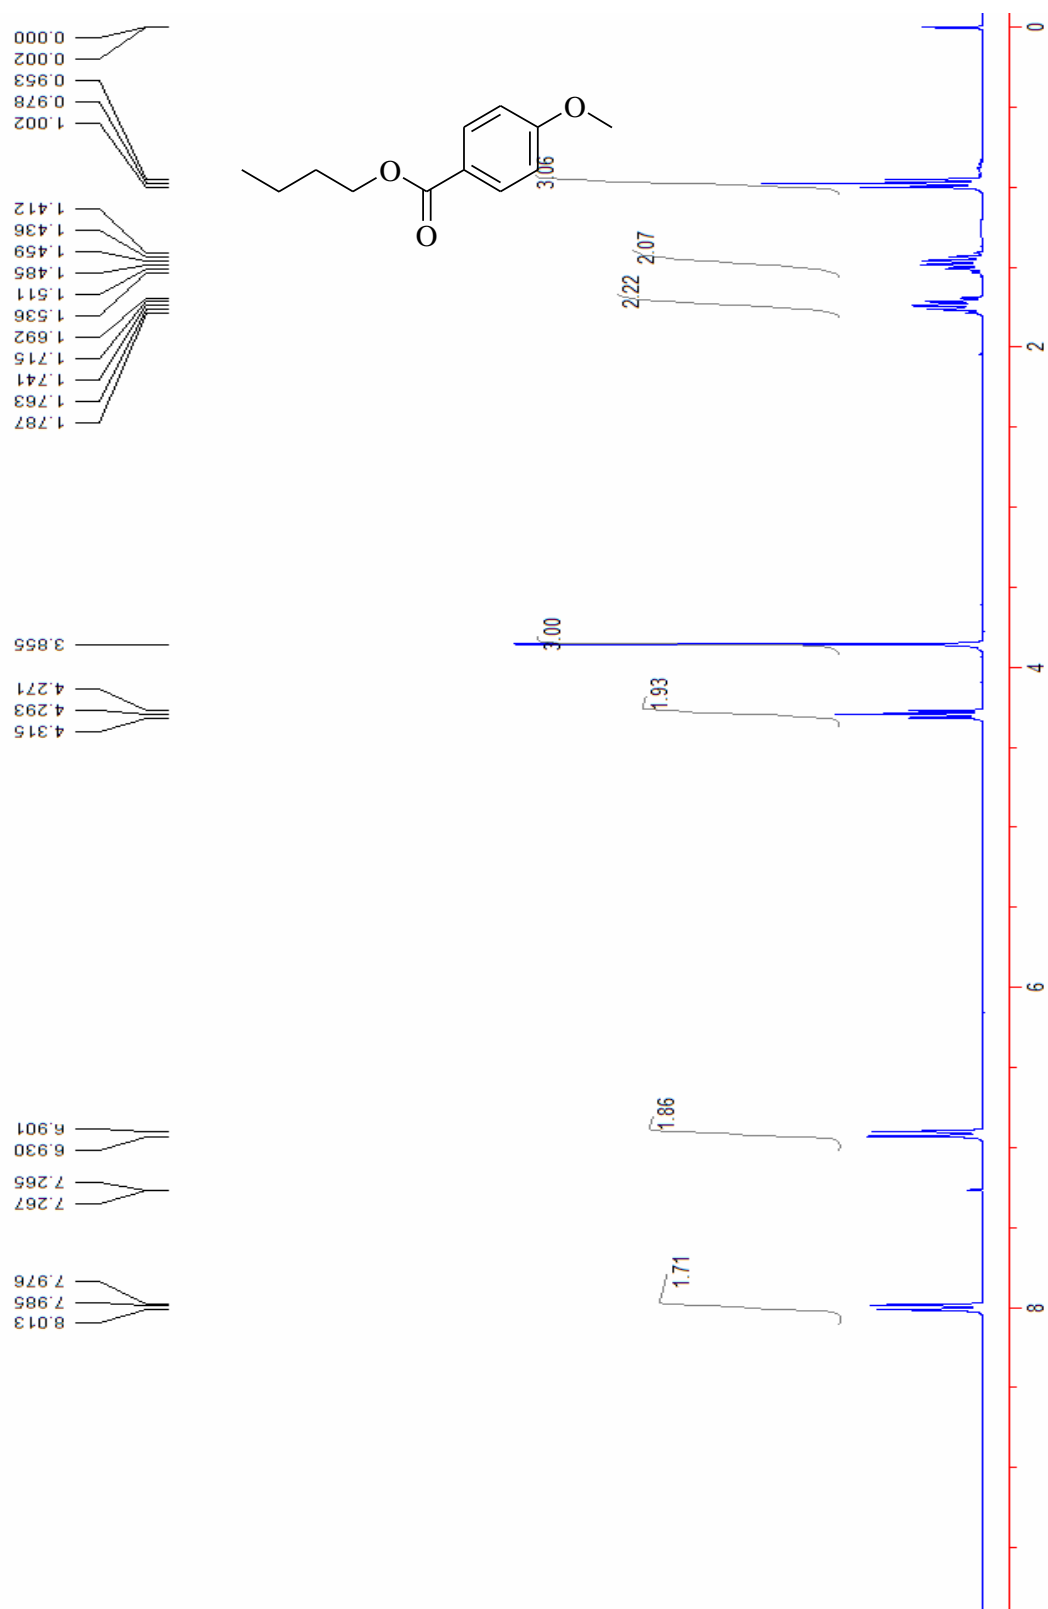

$^1\text{H}$  NMR of naphthalen-3-yl 4-chlorobenzoate **3ad**

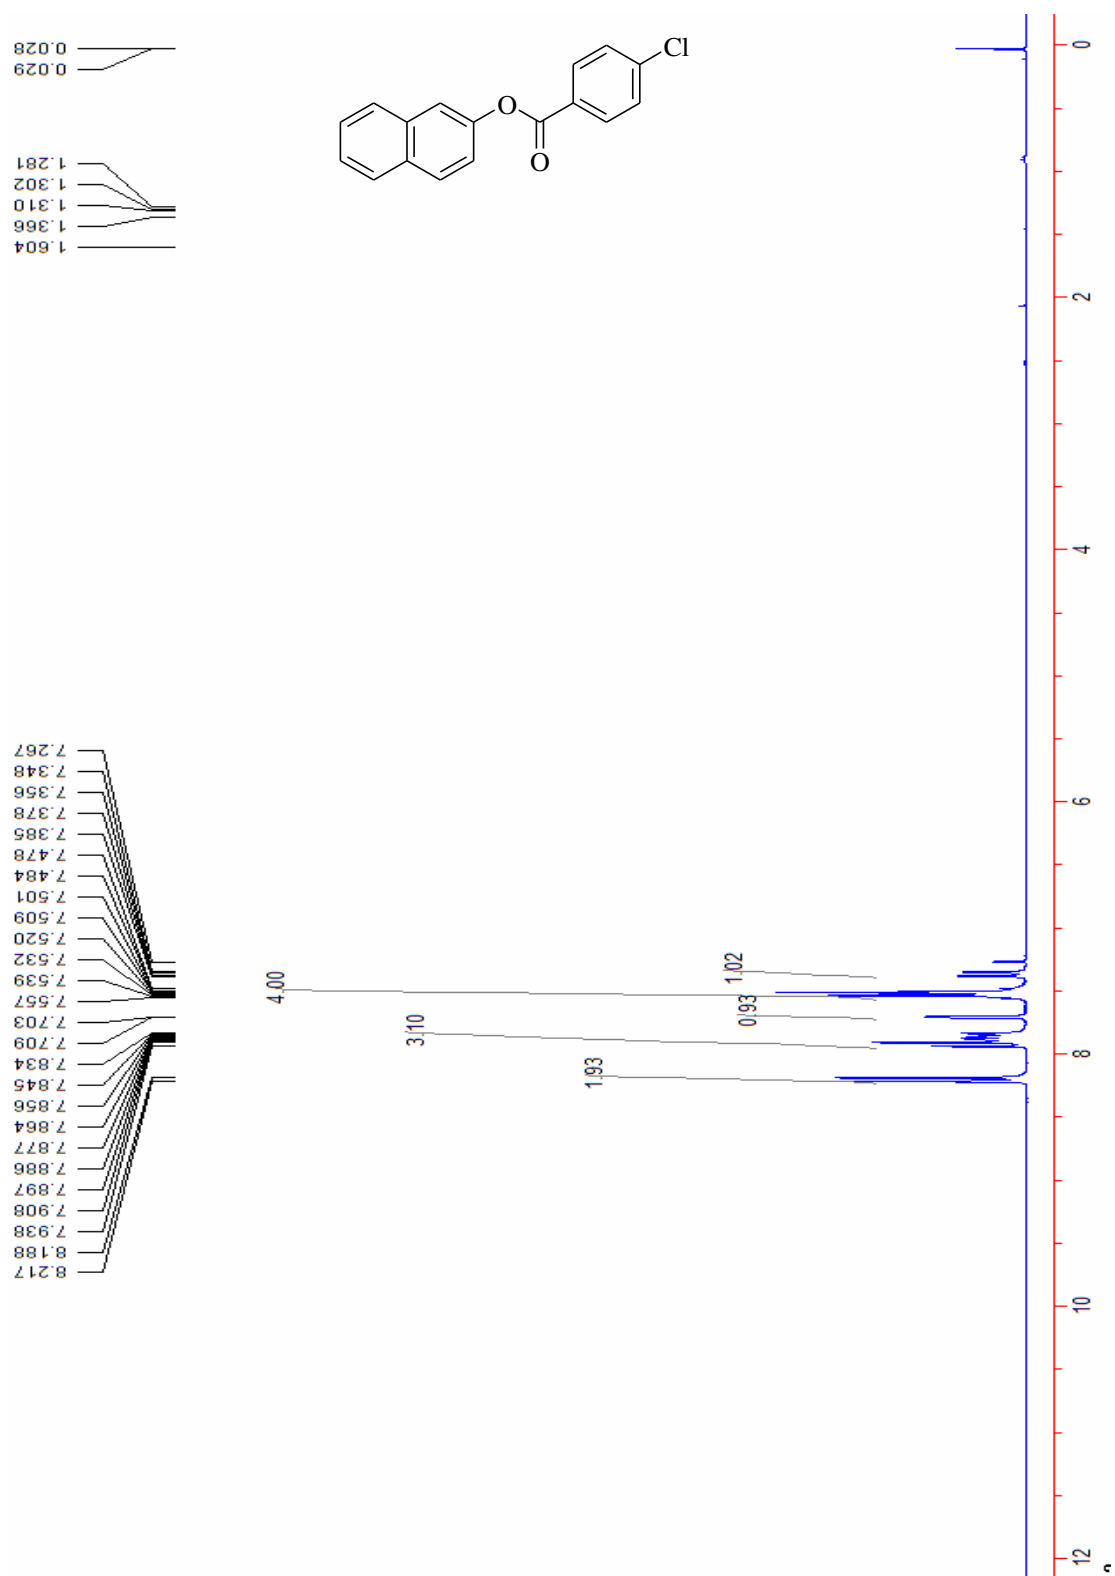

$^1\text{H}$  NMR of naphthalen-6-yl 4-methylbenzoate **3ac**

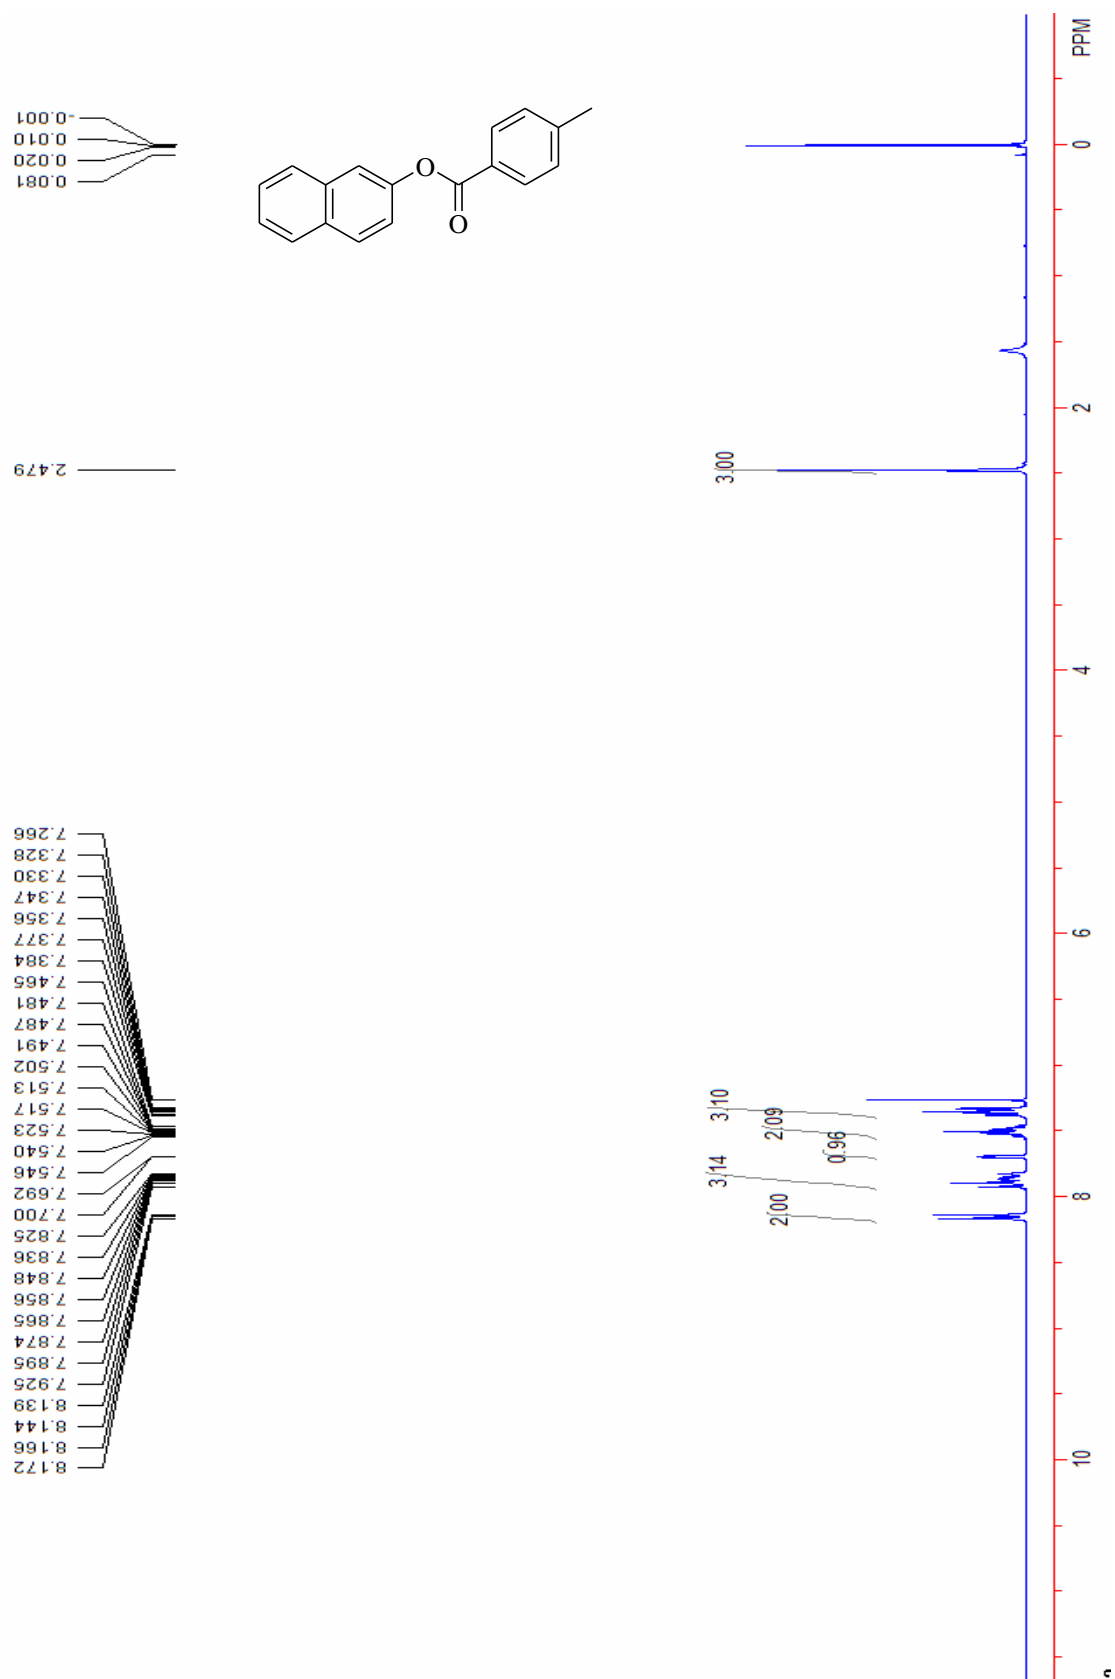

Supplement: c6ob00187d1.pdf [file c6ob00187d1.pdf]
